# Supplementary material
Source: PubMed Central journal article supplement (PMC7220165)
Supplement: mmc1.pdf [file mmc1.pdf]

# THE LANCET

## Respiratory Medicine

### Supplementary appendix

This appendix formed part of the original submission and has been peer reviewed.  
We post it as supplied by the authors.

Supplement to: Milne S, Yang CX, Timens W, Bossé Y, Sin DD. SARS-CoV-2 receptor ACE2 gene expression and RAAS inhibitors. *Lancet Respir Med* 2020; published online May 13. [http://dx.doi.org/10.1016/S2213-2600\(20\)30224-1](http://dx.doi.org/10.1016/S2213-2600(20)30224-1).











### 3. REFERENCES

1. Hao K, Bosse Y, Nickle DC, et al. Lung eQTLs to help reveal the molecular underpinnings of asthma. *PLoS Genet* 2012; **8**(11): e1003029. doi:10.1371/journal.pgen.1003029.
2. Irizarry RA, Hobbs B, Collin F, et al. Exploration, normalization, and summaries of high density oligonucleotide array probe level data. *Biostatistics* 2003; **4**(2): 249-64. doi:10.1093/biostatistics/4.2.249.
3. Leek JT, Johnson WE, Parker HS, Jaffe AE, Storey JD. The sva package for removing batch effects and other unwanted variation in high-throughput experiments. *Bioinformatics* 2012; **28**(6): 882-3. doi:10.1093/bioinformatics/bts034.
4. Edgar R, Domrachev M, Lash AE. Gene Expression Omnibus: NCBI gene expression and hybridization array data repository. *Nucleic Acids Res* 2002; **30**(1): 207-10. doi:10.1093/nar/30.1.207.
5. Kim S, Herazo-Maya JD, Kang DD, et al. Integrative phenotyping framework (iPF): integrative clustering of multiple omics data identifies novel lung disease subphenotypes. *BMC Genomics* 2015; **16**(1): 924. doi:10.1186/s12864-015-2170-4.
6. Leung JM, Yang CX, Tam A, et al. ACE-2 Expression in the Small Airway Epithelia of Smokers and COPD Patients: Implications for COVID-19. *Eur Respir J* 2020: 2000688. doi:10.1183/13993003.00688-2020.
